# Supplementary material for: Solution equilibria and the X-ray structure of Cu(ii) complexation with 3-amino-N-(pyridin-2-ylmethyl)propanamide, a pseudo-mimic of human serum albumin
Source: Royal Society of Chemistry journal article supplement (doi:10.1039/c6dt02974d), 2016-01-01
Supplement: c6dt02974d1.pdf [file c6dt02974d1.pdf]

**Table S1: Details of data collection and structure refinement for the crystal analysis of the Cu(II)-[H(56)NH<sub>2</sub>Cl]H<sub>1</sub> complex.**

| Compound                                          | Cu(II)-[H(56)NH <sub>2</sub> Cl] (CuLH <sub>1</sub> )                     |
|---------------------------------------------------|---------------------------------------------------------------------------|
| Formula                                           | Cu C <sub>9</sub> H <sub>12</sub> N <sub>3</sub> OCl, 2(H <sub>2</sub> O) |
| Molecular weight (g mol <sup>-1</sup> )           | 313.25                                                                    |
| Temperature (K)                                   | 173(2)                                                                    |
| Crystal system                                    | Monoclinic                                                                |
| Space group                                       | <i>P2<sub>1</sub>/c</i>                                                   |
| a (Å)                                             | 7.3116(2)                                                                 |
| b (Å)                                             | 22.4070(9)                                                                |
| c (Å)                                             | 7.3570(2)                                                                 |
| α (°)                                             | 90                                                                        |
| β (°)                                             | 90.080(2)                                                                 |
| γ (°)                                             | 90                                                                        |
| Volume of unit cell (Å <sup>3</sup> )             | 1205.30(7)                                                                |
| Z                                                 | 4                                                                         |
| No. of reflections collected                      | 5280                                                                      |
| No. unique reflections                            | 2860                                                                      |
| Calculated density (g cm <sup>-3</sup> )          | 1.726                                                                     |
| Absorption coefficient (mm <sup>-1</sup> )        | 2.034                                                                     |
| F(000)                                            | 644                                                                       |
| Crystal Size (mm)                                 | 0.05 x 0.07 x 0.10                                                        |
| Radiation                                         | Mo Kα (λ= 0.71073 Å)                                                      |
| theta range for data collection (°)               | 3.3 - 27.9                                                                |
| Reflections measured                              | 2860                                                                      |
| R, R <sub>w</sub> , goodness-of-fit               | 0.0267, 0.0668, 1.07                                                      |
| Min and max residual density (e Å <sup>-3</sup> ) | -0.65, 0.43                                                               |
