# Supplementary material for: Solution equilibria and the X-ray structure of Cu(ii) complexation with 3-amino-N-(pyridin-2-ylmethyl)propanamide, a pseudo-mimic of human serum albumin
Source: Royal Society of Chemistry journal article supplement (doi:10.1039/c6dt02974d), 2016-01-01
Supplement: c6dt02974d2.pdf [file c6dt02974d2.pdf]

**Table S2: Principal atomic distances and angles in Cu(II)-[H(56)NH<sub>2</sub>Cl]H<sub>1</sub> complex.**

| Distances (Å) |       |            |            |
|---------------|-------|------------|------------|
| Cu1           | -Cl1  | 2.6736(5)  |            |
| Cu1           | -N1   | 1.9896(17) |            |
| Cu1           | -N2   | 1.9756(15) |            |
| Cu1           | -N3   | 1.9783(16) |            |
| Cu1           | Cl1_a | 2.3229(5)  |            |
| O1            | -C3   | 1.277(3)   |            |
| O2            | -H2D  | 0.97(2)    |            |
| O2            | -H2C  | 0.968(16)  |            |
| O3            | -H3A  | 0.97(2)    |            |
| O3            | -H3B  | 0.97(2)    |            |
| N1            | -C1   | 1.478(3)   |            |
| N2            | -C3   | 1.317(3)   |            |
| N2            | -C4   | 1.464(3)   |            |
| N3            | -C5   | 1.344(3)   |            |
| N3            | -C9   | 1.350(3)   |            |
| N1            | -H1D  | 0.879(9)   |            |
| N1            | -H1C  | 0.880(11)  |            |
| C1            | -C2   | 1.518(3)   |            |
| C2            | -C3   | 1.514(3)   |            |
| C4            | -C5   | 1.501(3)   |            |
| C5            | -C6   | 1.391(3)   |            |
| C6            | -C7   | 1.383(3)   |            |
| C7            | -C8   | 1.390(3)   |            |
| C8            | -C9   | 1.373(3)   |            |
| C1            | -H1B  | 0.9900     |            |
| C1            | -H1A  | 0.9900     |            |
| C2            | -H2A  | 0.9900     |            |
| C2            | -H2B  | 0.9900     |            |
| C4            | -H4A  | 0.9900     |            |
| C4            | -H4B  | 0.9900     |            |
| C6            | -H6   | 0.9500     |            |
| C7            | -H7   | 0.9500     |            |
| C8            | -H8   | 0.9500     |            |
| C9            | -H9   | 0.9500     |            |
| Angles (°)    |       |            |            |
| Cl1           | -Cu1  | -N1        | 88.88(4)   |
| Cl1           | -Cu1  | -N2        | 113.46(4)  |
| Cl1           | -Cu1  | -N3        | 88.98(4)   |
| Cl1           | -Cu1  | -Cl1_a     | 95.55(2)   |
| N1            | -Cu1  | -N2        | 94.12(6)   |
| N1            | -Cu1  | -N3        | 175.17(6)  |
| Cl1_a         | -Cu1  | -N1        | 91.63(5)   |
| N2            | -Cu1  | -N3        | 82.77(6)   |
| Cl1_a         | -Cu1  | -N2        | 150.49(5)  |
| Cl1_a         | -Cu1  | -N3        | 92.88(5)   |
| Cu1           | -Cl1  | -Cu1_b     | 107.58(2)  |
| H2C           | -O2   | -H2D       | 98.1(19)   |
| H3A           | -O3   | -H3B       | 104.9(19)  |
| Cu1           | -N1   | -C1        | 111.07(12) |
| Cu1           | -N2   | -C3        | 130.45(14) |
| C3            | -N2   | -C4        | 115.20(16) |
| Cu1           | -N2   | -C4        | 113.80(12) |
| Cu1           | -N3   | -C9        | 124.99(13) |
| C5            | -N3   | -C9        | 119.50(16) |
| Cu1           | -N3   | -C5        | 115.51(12) |
| H1C           | -N1   | -H1D       | 107(2)     |
| C1            | -N1   | -H1C       | 110.5(13)  |
| C1            | -N1   | -H1D       | 107.1(15)  |
| Cu1           | -N1   | -H1C       | 110.4(13)  |
| Cu1           | -N1   | -H1D       | 110.8(16)  |
| N1            | -C1   | -C2        | 112.21(17) |
| C1            | -C2   | -C3        | 118.80(17) |
| N2            | -C3   | -C2        | 118.45(18) |
| C6            | -C7   | -H7        | 120.00     |
| C7            | -C8   | -H8        | 121.00     |
| C9            | -C8   | -H8        | 121.00     |
| O1            | -C3   | -C2        | 117.31(17) |
| O1            | -C3   | -N2        | 124.24(19) |
| N2            | -C4   | -C5        | 110.32(17) |
| C4            | -C5   | -C6        | 122.63(19) |
| N3            | -C5   | -C4        | 116.29(17) |
| N3            | -C5   | -C6        | 121.08(17) |
| C5            | -C6   | -C7        | 119.1(2)   |
| C6            | -C7   | -C8        | 119.53(19) |
| C7            | -C8   | -C9        | 118.46(19) |
| N3            | -C9   | -C8        | 122.30(19) |
| N1            | -C1   | -H1A       | 109.00     |
| C2            | -C1   | -H1B       | 109.00     |
| H1A           | -C1   | -H1B       | 108.00     |
| N1            | -C1   | -H1B       | 109.00     |
| C2            | -C1   | -H1A       | 109.00     |
| C3            | -C2   | -H2A       | 108.00     |
| C1            | -C2   | -H2A       | 108.00     |
| C1            | -C2   | -H2B       | 108.00     |
| H2A           | -C2   | -H2B       | 107.00     |
| C3            | -C2   | -H2B       | 108.00     |
| N2            | -C4   | -H4B       | 110.00     |
| C5            | -C4   | -H4A       | 110.00     |
| H4A           | -C4   | -H4B       | 108.00     |
| C5            | -C4   | -H4B       | 110.00     |
| N2            | -C4   | -H4A       | 110.00     |
| C5            | -C6   | -H6        | 121.00     |
| C7            | -C6   | -H6        | 120.00     |
| C8            | -C7   | -H7        | 120.00     |
| C8            | -C9   | -H9        | 119.00     |
| N3            | -C9   | -H9        | 119.00     |
